# Supplementary figures and images for: Hydroxytyrosol Effectively Improves The Quality of Pig Sperm at 17 °C
Source: Research Square preprint supplement (doi:10.21203/rs.3.rs-152596/v1), 2021-01-28

**Supplement Fig. 5**

**a**


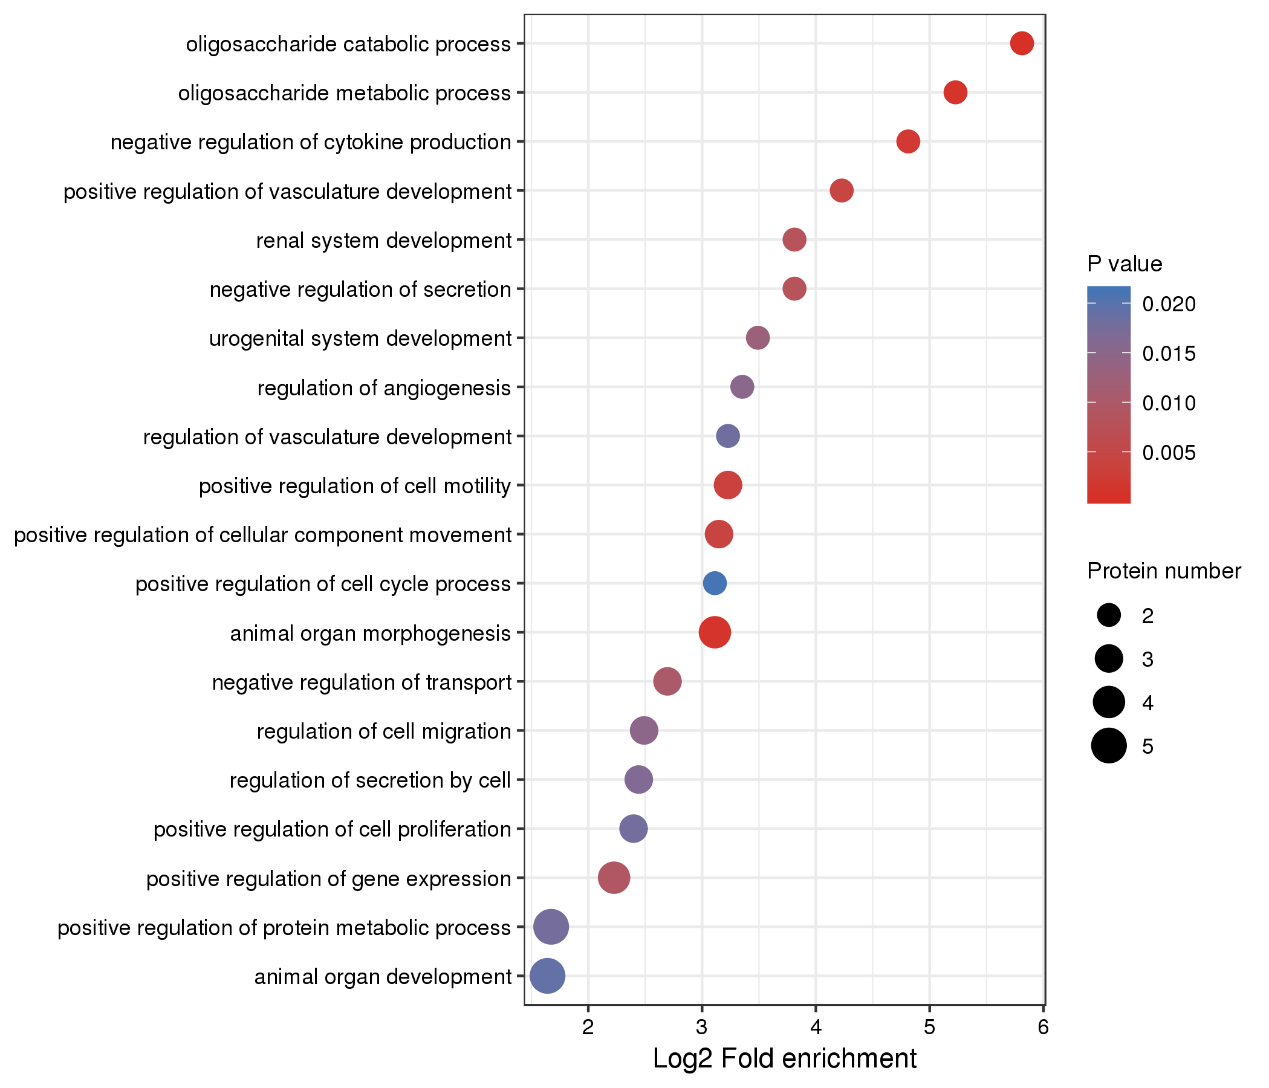


**b**


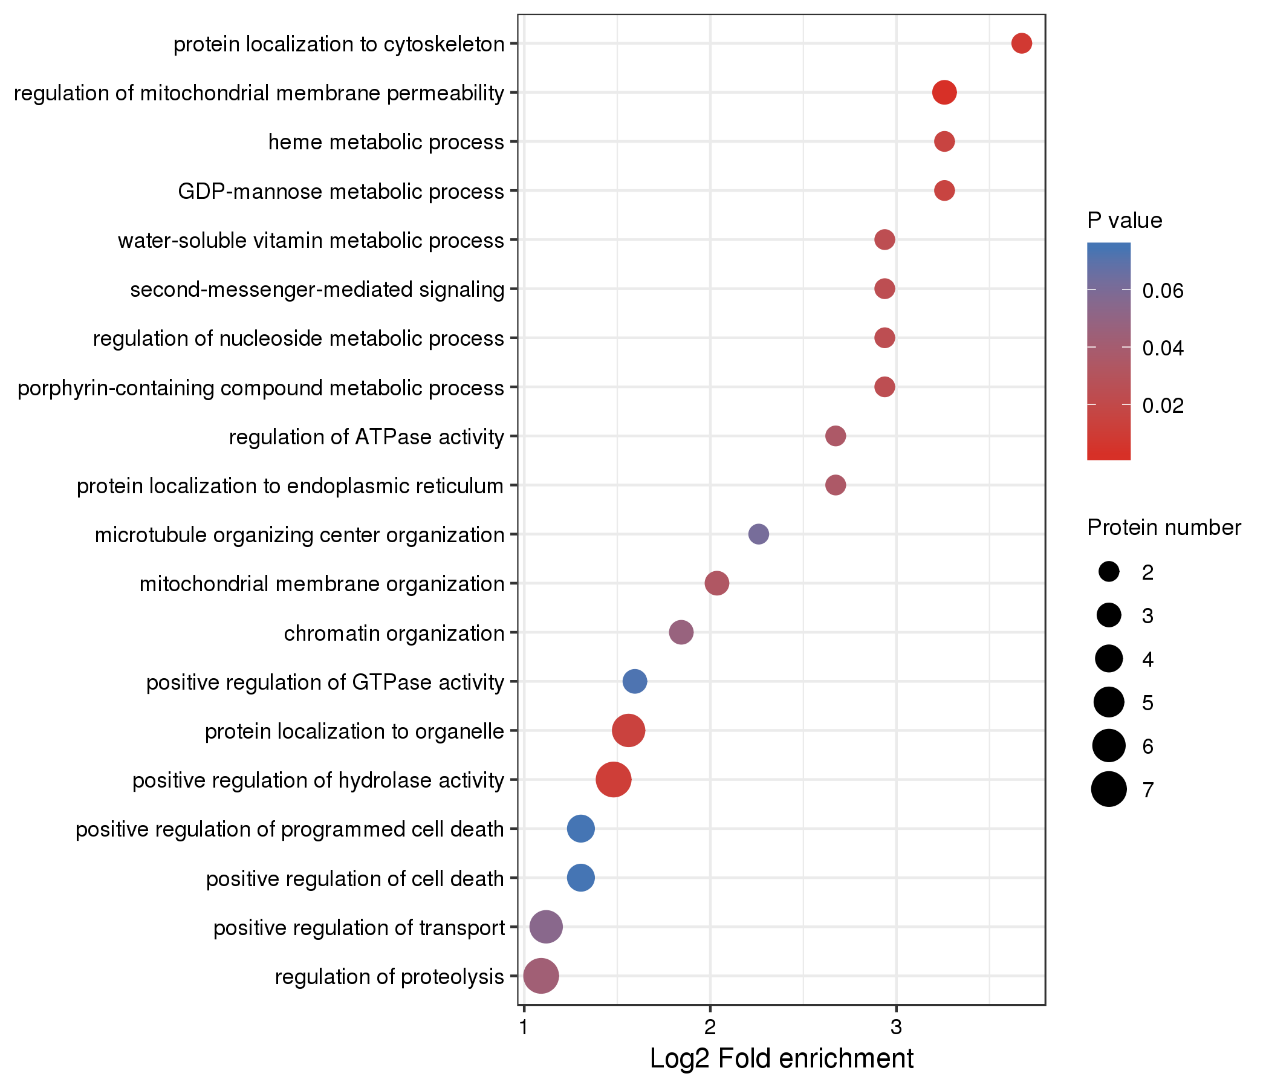


**c**


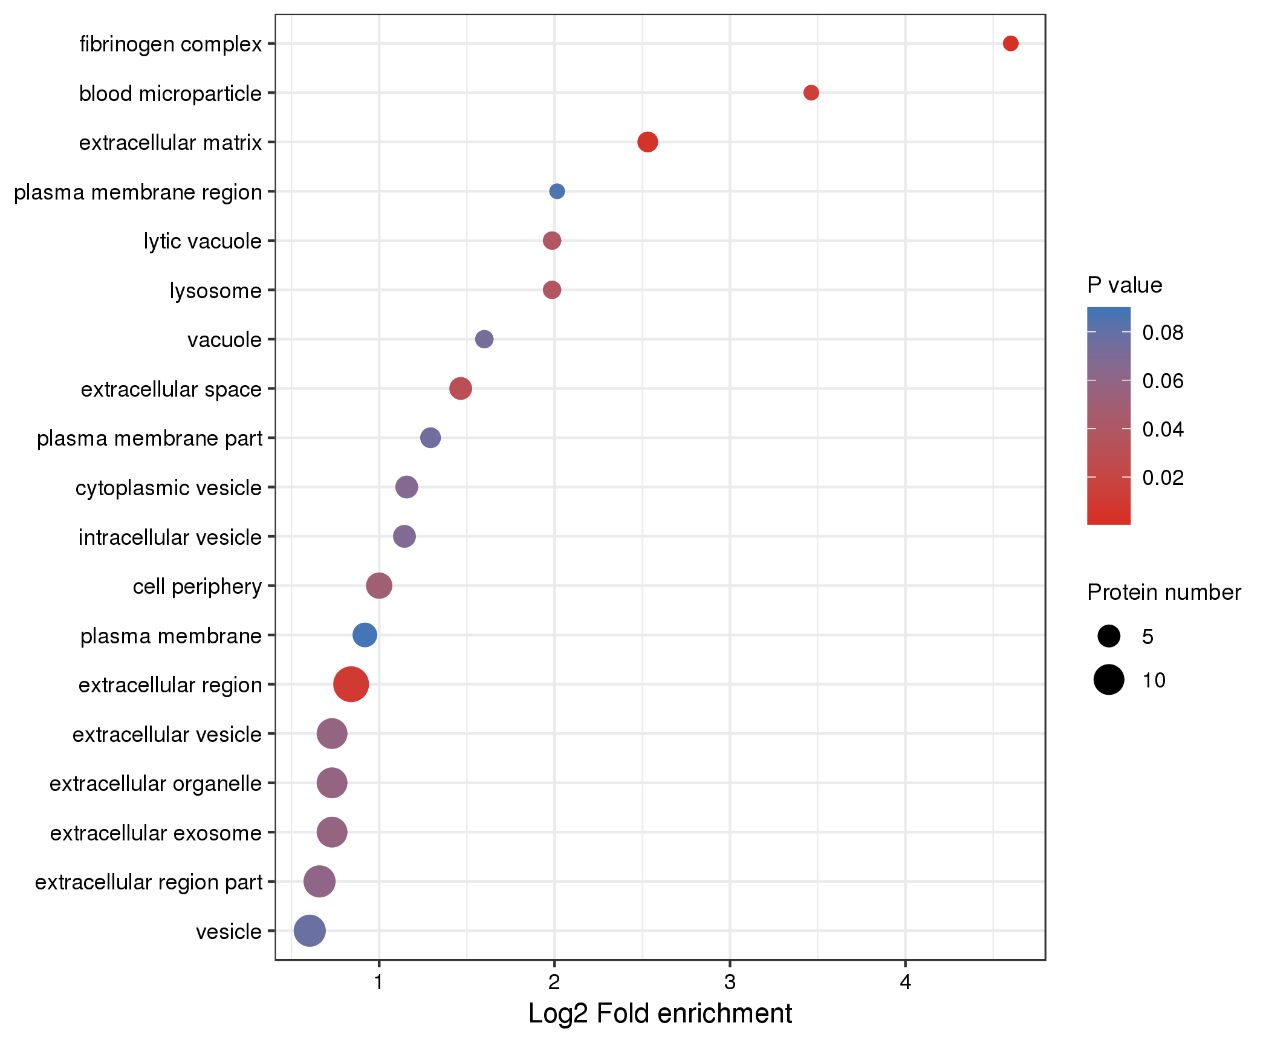


**d**


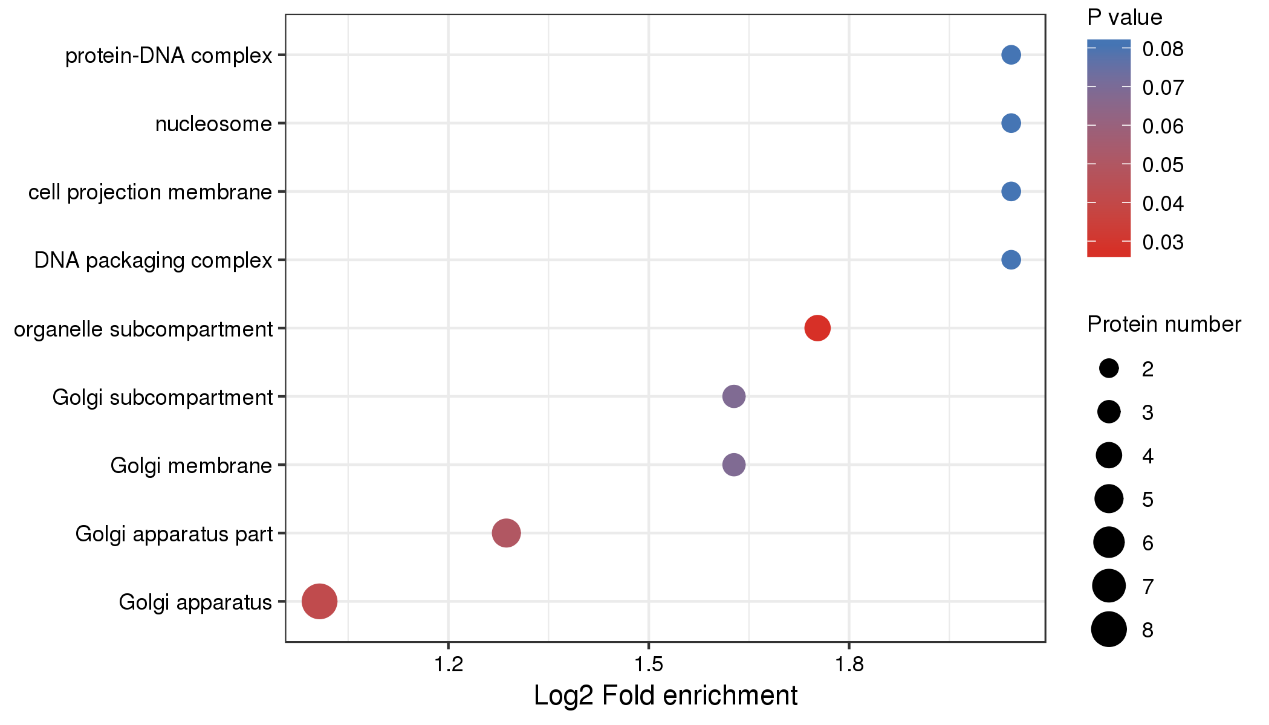


**e**


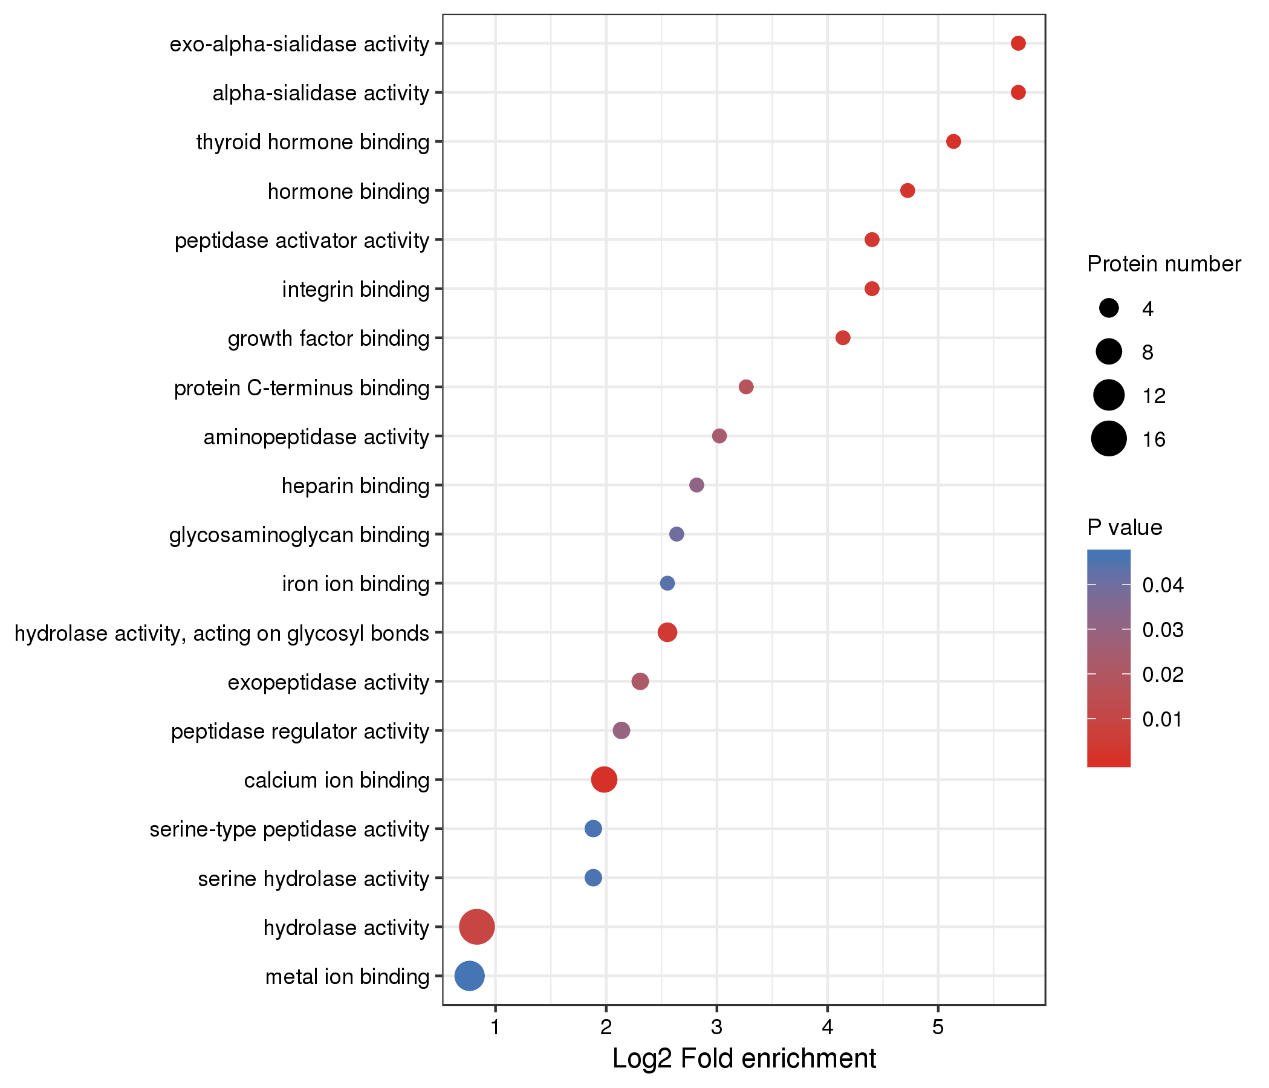


**f**


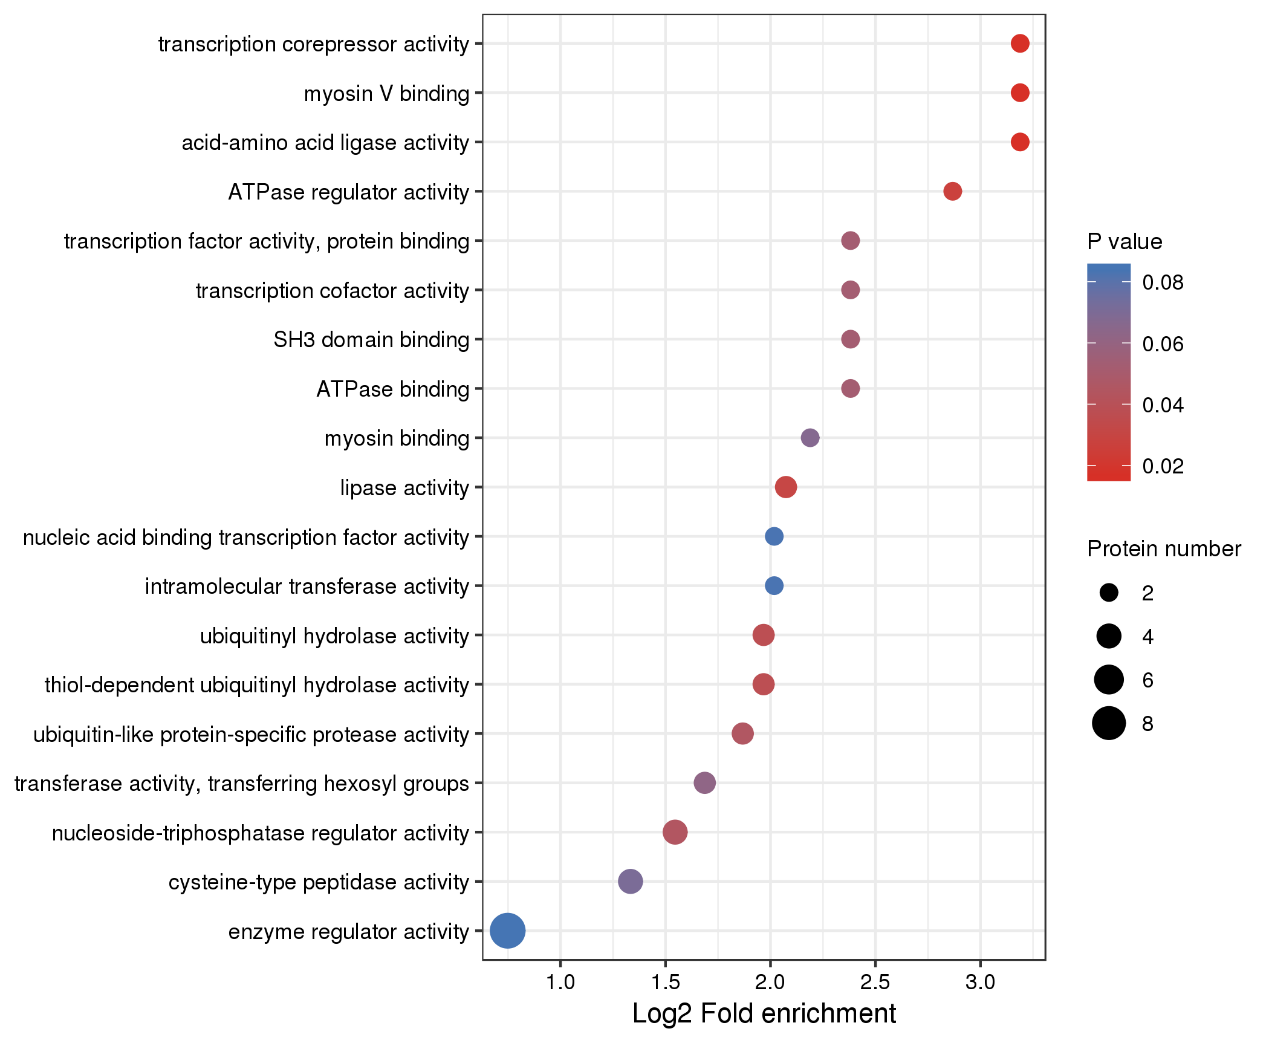

Supplement: Supplementary file 1 [file 887f866b8221114444bedbbe.docx]
